# Supplementary material
Source: HighWire-hosted journal article supplement (https://www.cmaj.ca/highwire/filestream/57762/field_highwire_adjunct_files/0/acupunct-lee-appendix_1.pdf)
Supplement: acupunct-lee-appendix_1.pdf [file acupunct-lee-appendix_1.pdf]

**Appendix 1 (as supplied by the authors):** The information of Asian databases and Journals searched.

| Database                                                                    | URL                                                                                                                         |
|-----------------------------------------------------------------------------|-----------------------------------------------------------------------------------------------------------------------------|
| <b>Korean Databases (13)</b>                                                |                                                                                                                             |
| Korean Studies Information                                                  | <a href="http://kiss.kstudy.com/">http://kiss.kstudy.com/</a>                                                               |
| DBPIA                                                                       | <a href="http://www.dbpia.co.kr/">http://www.dbpia.co.kr/</a>                                                               |
| Korea Institute of Science and Technology Information                       | <a href="http://society.kisti.re.kr/main.html">http://society.kisti.re.kr/main.html</a>                                     |
| Research Information Centre for Health Database                             | <a href="http://www.richis.org/">http://www.richis.org/</a>                                                                 |
| Korean Medical Database                                                     | <a href="http://kmbase.medic.or.kr/">http://kmbase.medic.or.kr/</a>                                                         |
| KoreaMed                                                                    | <a href="http://www.koreamed.org/">http://www.koreamed.org/</a>                                                             |
| National Digital Library                                                    | <a href="http://www.dlibrary.go.kr/">http://www.dlibrary.go.kr/</a>                                                         |
| Korea Knowledge Portal                                                      | <a href="https://www.knowledge.go.kr/">https://www.knowledge.go.kr/</a>                                                     |
| The National Library of Korea                                               | <a href="http://nl.go.kr/">http://nl.go.kr/</a>                                                                             |
| Korean Library Information System Network                                   | <a href="http://nl.go.kr/kolisnet/index.php">http://nl.go.kr/kolisnet/index.php</a>                                         |
| Korean Traditional Knowledge Portal                                         | <a href="http://www.koreantk.com/">http://www.koreantk.com/</a>                                                             |
| Research Information Service System                                         | <a href="http://www.riss4u.net/">http://www.riss4u.net/</a>                                                                 |
| Korean National Assembly Library (NDSL)                                     | <a href="http://www.ndsl.kr/index.do">http://www.ndsl.kr/index.do</a>                                                       |
| <b>Chinese Medical Databases (4)</b>                                        |                                                                                                                             |
| China Academic Journal                                                      | <a href="http://www.cnki.co.kr">www.cnki.co.kr</a>                                                                          |
| China Doctor/Master Dissertation Full Text DB                               |                                                                                                                             |
| China Proceedings Conference Full Text DB                                   |                                                                                                                             |
| China Core Newspapers Database                                              |                                                                                                                             |
| <b>Japanese Databases (4)</b>                                               |                                                                                                                             |
| Japan Science and Technology Agency                                         | <a href="http://www.jstage.jst.go.jp/browse/">http://www.jstage.jst.go.jp/browse/</a>                                       |
| Science Link Japan                                                          | <a href="http://sciencelinks.jp/">http://sciencelinks.jp/</a>                                                               |
| Journal @rchive                                                             | <a href="http://www.journalarchive.jst.go.jp/english/top_en.php">http://www.journalarchive.jst.go.jp/english/top_en.php</a> |
| National Institute of Informatics Scholarly and Academic Information Portal | <a href="http://ci.nii.ac.jp/">http://ci.nii.ac.jp/</a>                                                                     |
| <b>Major Korean traditional medicine journals (12)</b>                      |                                                                                                                             |
| Journal of Meridian & Acupoint                                              |                                                                                                                             |
| Journal of Korean Institute of Herbal Acupuncture                           |                                                                                                                             |
| Korean Journal of Oriental Internal Medicine                                |                                                                                                                             |
| Journal of Korean Oriental Medicine                                         |                                                                                                                             |
| Korean Journal of Oriental Physiology and Pathology                         |                                                                                                                             |
| Journal of Oriental Rehabilitation Medicine                                 |                                                                                                                             |
| Oriental Pharmacy and Experimental Medicine                                 |                                                                                                                             |
| The Journal of Korea CHUNA Manual Medicin                                   |                                                                                                                             |
| The Journal of Korean Acupuncture and Moxibustion Society                   |                                                                                                                             |
| Journal of Oriental Neuropsychiatry                                         |                                                                                                                             |
| Journal of Sasang Constitutional Medicine                                   |                                                                                                                             |
| The Korean Journal of Joongpoong                                            |                                                                                                                             |
